# Supplementary material for: Modelling brain dopamine-serotonin vesicular transport disease in Caenorhabditis elegans
Source: PubMed Central journal article supplement (PMC6262812; doi:10.1242/dmm.035709), 2018-11-09
Supplement: dmm-11-035709-s1.pdf [file dmm-11-035709-s1.pdf]

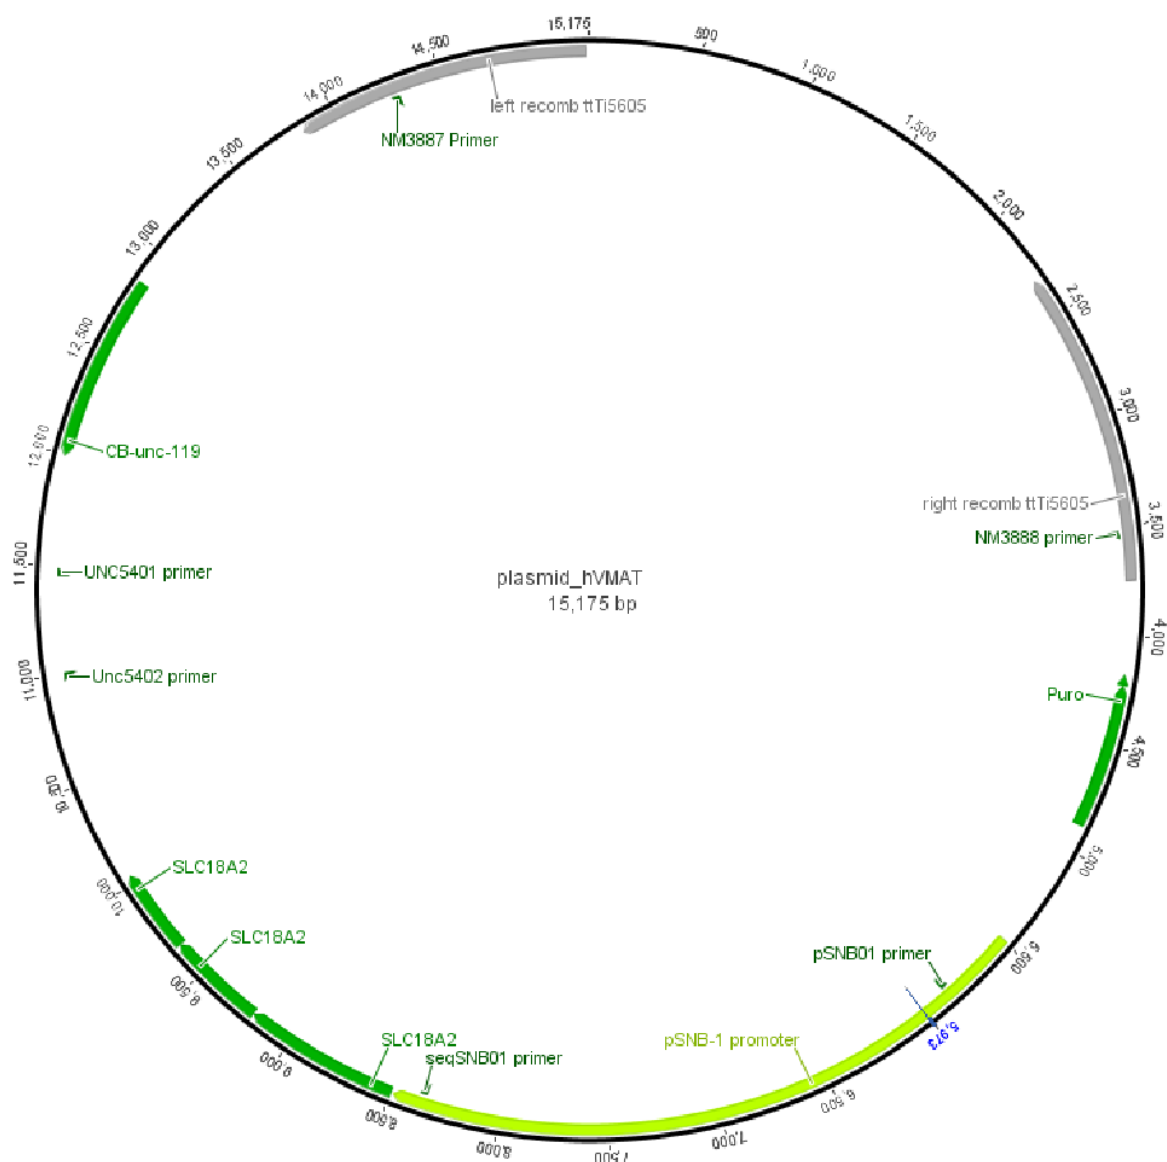

Fig. S1. The plasmid template used in microinjection. Human *SLC18A2*, a synaptobrevin promotor (pSNB-1), and *unc-119* are contained within Left and Right homologous recombination sequences. Primers are shown with arrows indicating direction.

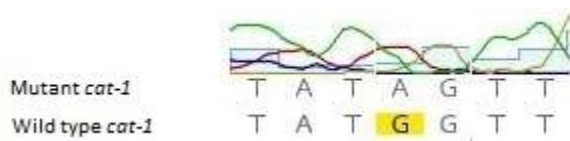

Fig. S2. Sanger traces confirming the KO *cat-1* genotype in transgenic nematodes created in this study.

Table S1. Grazing data from each strain and treatment. N = 30 for each strain in each treatment. SD: standard deviation, SE: standard error.

| Strain        | No drug |       |       | Pramipexole |        |       | Serotonin |       |       |
|---------------|---------|-------|-------|-------------|--------|-------|-----------|-------|-------|
|               | Mean    | SD    | SE    | Mean        | SD     | SE    | Mean      | SD    | SE    |
| <b>CB1111</b> | 11.83   | 5.676 | 1.036 | 27.50       | 9.716  | 1.774 | 32.17     | 15.37 | 2.806 |
| <b>N2</b>     | 40.83   | 8.587 | 1.568 | 36.17       | 10.900 | 1.990 | 37.87     | 13.43 | 2.452 |
| <b>P237H</b>  | 13.30   | 5.590 | 1.021 | 29.23       | 11.830 | 2.160 | 33.87     | 14.04 | 2.564 |
| <b>P387L</b>  | 11.60   | 4.903 | 0.895 | 31.40       | 8.3860 | 1.531 | 36.07     | 14.12 | 2.578 |
| <b>WT</b>     | 41.30   | 9.308 | 1.699 | 37.33       | 13.680 | 2.497 | 39.50     | 14.14 | 2.582 |

Table S2. Pharyngeal pumping data from each strain and treatment. N ≥ 30 for each strain in each treatment. SD: standard deviation, SE: standard error

| Strain        | No drug |        |       | Pramipexole |        |       | Serotonin |        |       |
|---------------|---------|--------|-------|-------------|--------|-------|-----------|--------|-------|
|               | Mean    | SD     | SE    | Mean        | SD     | SE    | Mean      | SD     | SE    |
| <b>CB1111</b> | 176.6   | 28.962 | 3.053 | 171.0       | 27.914 | 5.096 | 238.4     | 18.517 | 3.381 |
| <b>N2</b>     | 269.2   | 22.210 | 2.341 | 230.8       | 24.498 | 4.473 | 246.4     | 16.075 | 2.935 |
| <b>P237H</b>  | 198.0   | 30.510 | 3.216 | 191.2       | 26.471 | 4.833 | 233.4     | 16.598 | 3.030 |
| <b>P387L</b>  | 208.5   | 27.136 | 2.477 | 225.7       | 22.884 | 4.178 | 234.1     | 16.490 | 3.011 |
| <b>WT</b>     | 240.3   | 23.177 | 2.443 | 228.0       | 21.640 | 3.950 | 239.7     | 18.434 | 3.366 |

Table S3. Primer sequences.

| <b>Primer</b>     | <b>Sequence (5'-3')</b> |
|-------------------|-------------------------|
| <b>unc5401</b>    | TGTCAAGAGTTTCGAGGACG    |
| <b>unc5402</b>    | CTTTCTCCCTGTGCTCCCAC    |
| <b>NM3880</b>     | AGGCAGAATGTGAACAAGACTCG |
| <b>NM3884</b>     | ATCGGGAGGCCGAACCTAACTG  |
| <b>NM3887</b>     | ACCGGAAACCAAAGGACGAGAG  |
| <b>NM3888</b>     | ACGCCCAGGAGAACACGTTAG   |
| <b>seqSNB01</b>   | ATGCATAAATGGGCGTCGC     |
| <b>pSNB01</b>     | CGTCGGCGAGTATGTGTGTG    |
| <b>SSU18A</b>     | AAAGATTAAGCCATGCATG     |
| <b>SSU26R</b>     | CATTCTTGGCAAATGCTTTTCG  |
| <b>seqhVMATf1</b> | GCAAGTTGGTCTGTTGTTTGCC  |
| <b>seqhVMATr1</b> | GGCATCATTGACGAATCCACC   |
